# Supplementary material for: Interval dosing with the HDAC inhibitor vorinostat effectively reverses HIV latency
Source: JCI journal article supplement (doi:10.1172/jci92684), 2017-07-16
Supplement: sd2 [file 2]

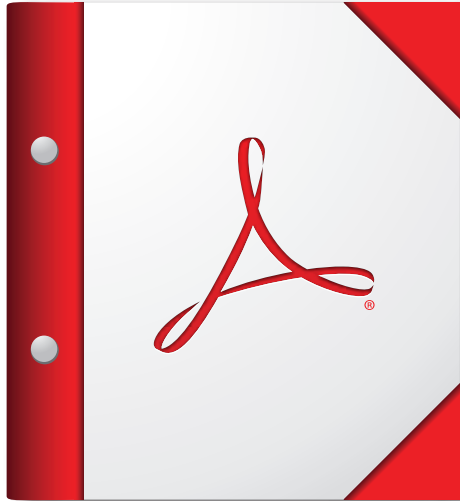

**For the best experience, open this PDF portfolio in  
Acrobat X or Adobe Reader X, or later.**

[Get Adobe Reader Now!](#)
